# Supplementary material for: Ischemic stroke induces cardiac dysfunction and alters transcriptome profile in mice
Source: PubMed Central journal article supplement (PMC8418010; doi:10.1186/s12864-021-07938-y), 2021-09-04
Supplement: 12864_2021_7938_MOESM1_ESM.pdf [file 12864_2021_7938_MOESM1_ESM.pdf]

A

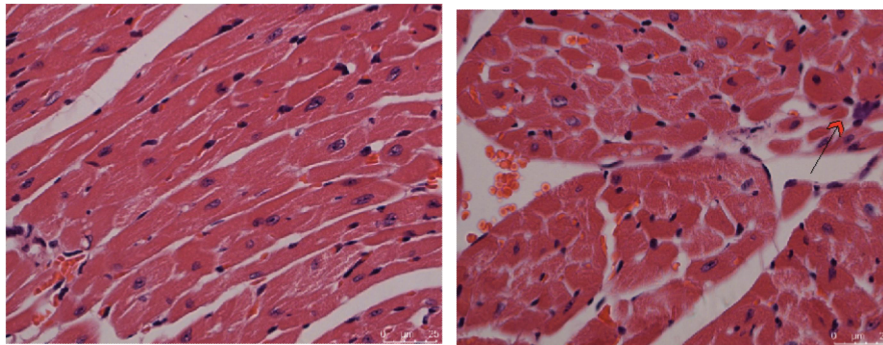

Sham

MCAO

B

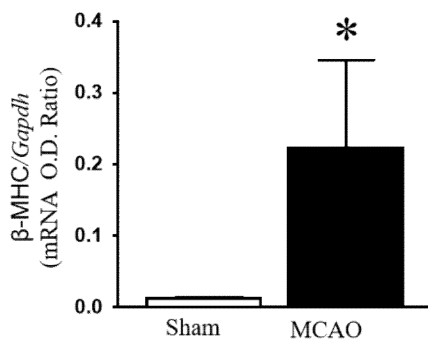

C

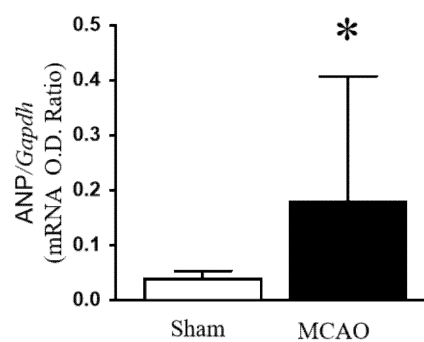

D

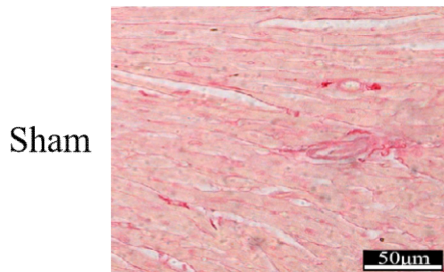

Sham

MCAO

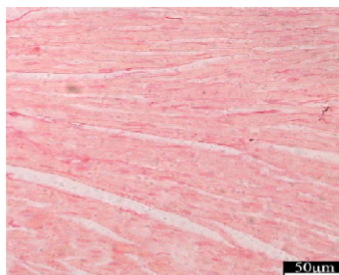

E

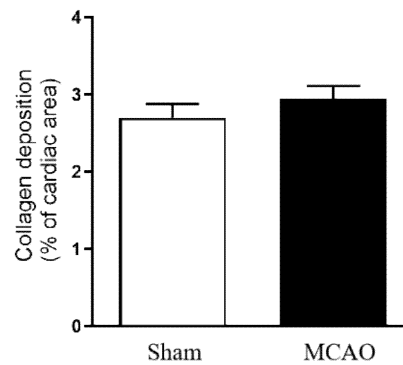

**Supplemental Figure S1. Myocardial remodeling in the heart after stroke.** (A) Hematoxylin and eosin (HE) staining in the heart tissue at 4 days after stroke. (B, C) The mRNA levels of  $\beta$ -MHC and ANP genes normalized to the level of Gapdh. (D,E) Representative and quantitation of picro-sirius red staining for collagen deposition (red). Data are presented as mean  $\pm$  SD, n = 6. \*P < 0.05 vs sham-operated.
