# Supplementary material for: Ischemic stroke induces cardiac dysfunction and alters transcriptome profile in mice
Source: PubMed Central journal article supplement (PMC8418010; doi:10.1186/s12864-021-07938-y), 2021-09-04
Supplement: 12864_2021_7938_MOESM2_ESM.pdf [file 12864_2021_7938_MOESM2_ESM.pdf]

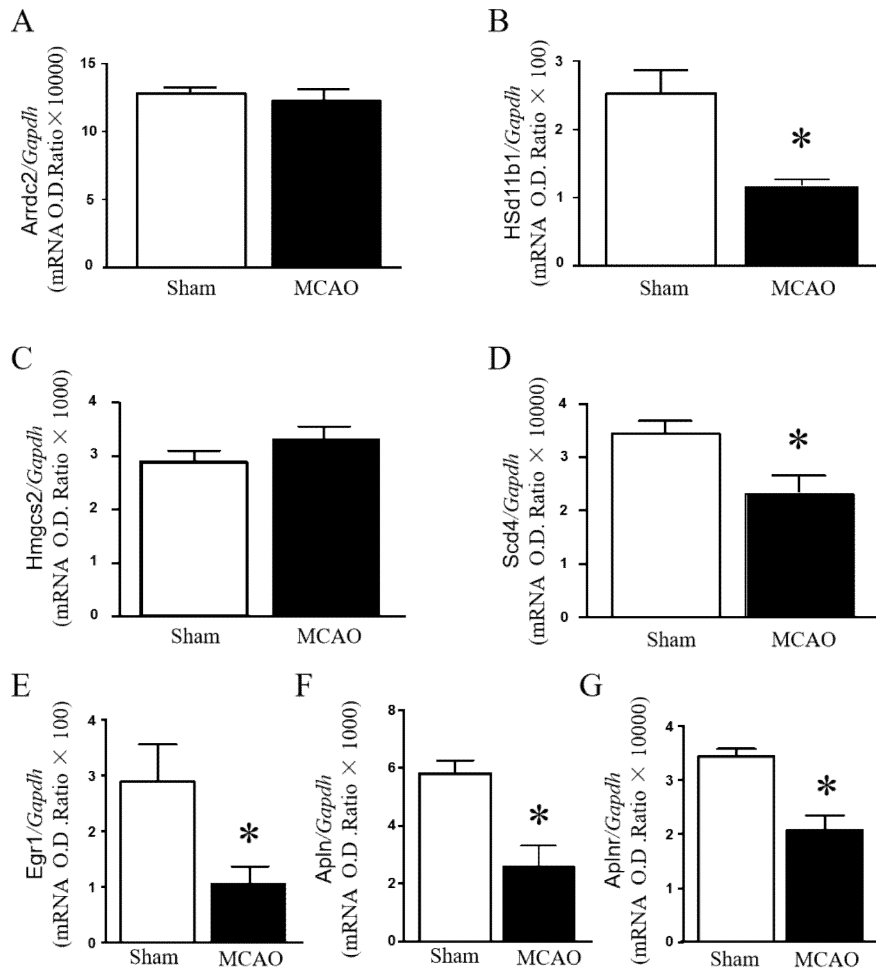

**Supplemental Figure S2.** The mRNA expression levels of genes in heart. Data are presented as mean  $\pm$  SD, n = 6. \*P < 0.05 vs sham-operated.
