# Supplementary material for: Ischemic stroke induces cardiac dysfunction and alters transcriptome profile in mice
Source: PubMed Central journal article supplement (PMC8418010; doi:10.1186/s12864-021-07938-y), 2021-09-04

Atrogin-1 (42kDa ): s=Sham, m=MCAO Model

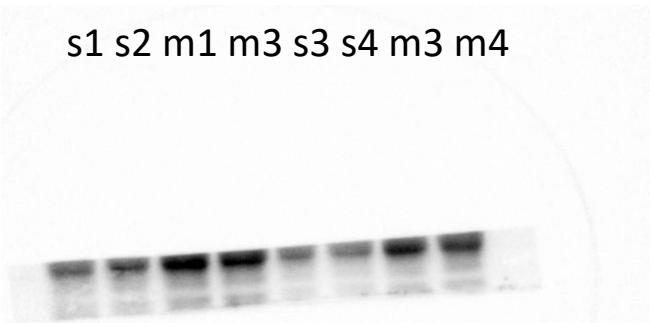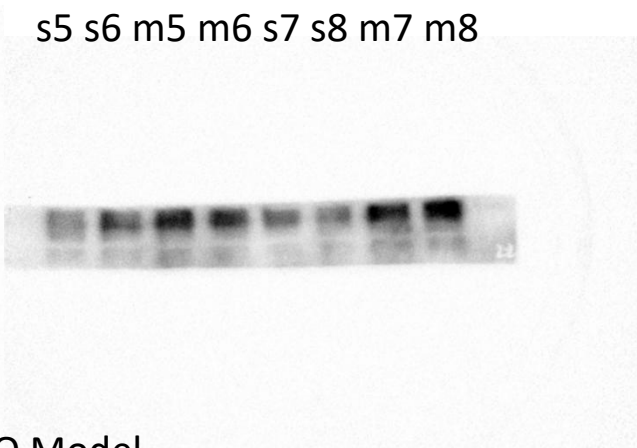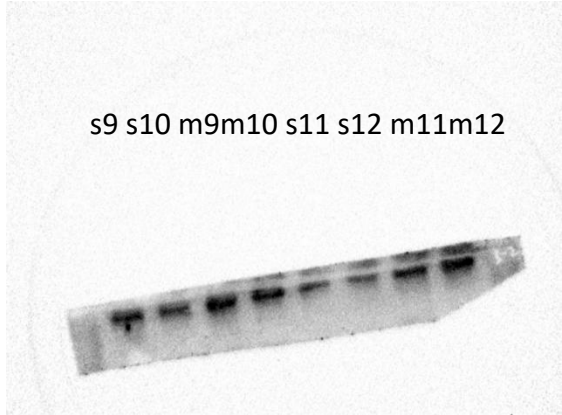

GAPDH (37 kDa ): s=Sham, m=MCAO Model

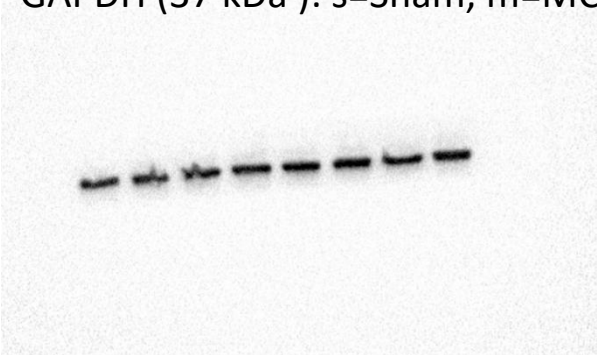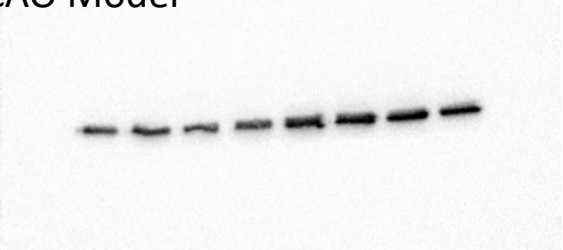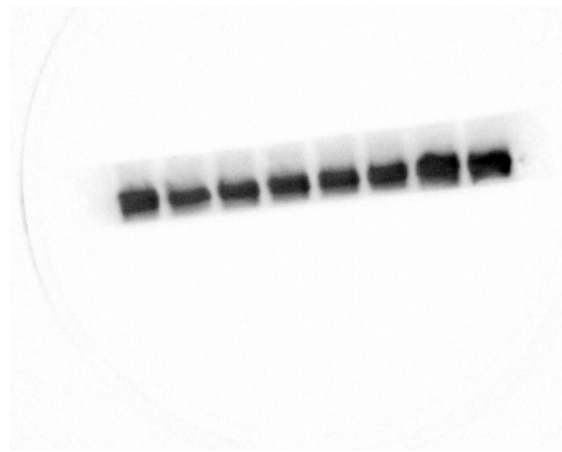

MuRF-1(40kDa ): s=Sham, m=MCAO Model

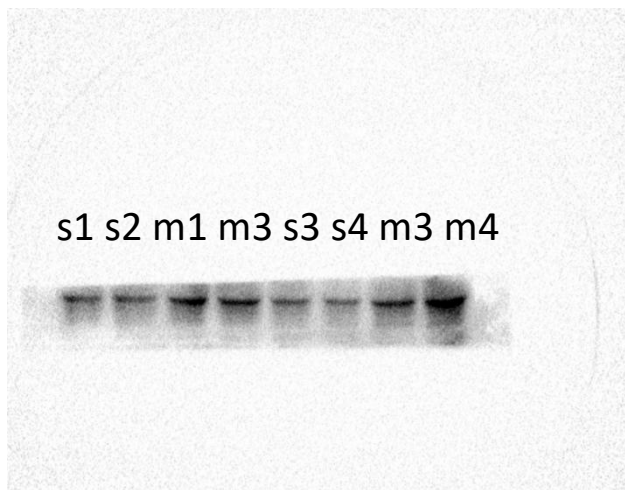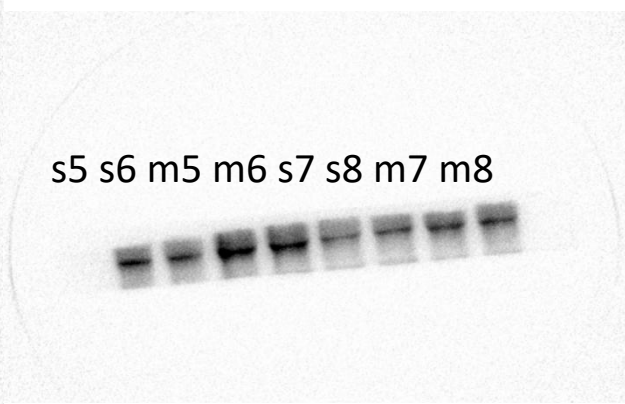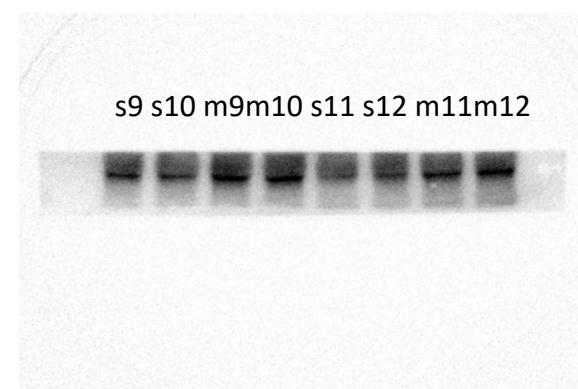

GAPDH (37 kDa ): s=Sham, m=MCAO Model

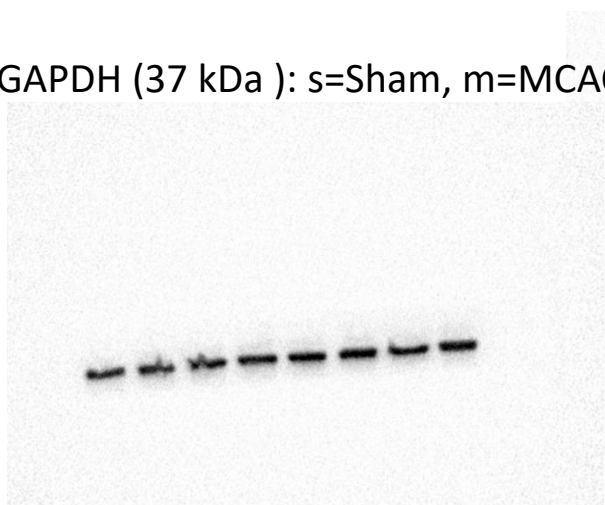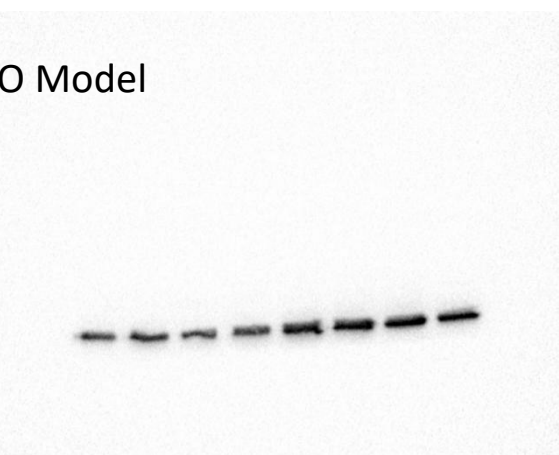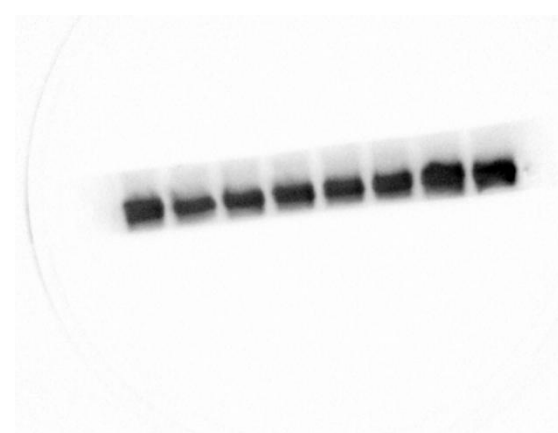

Supplement: 12864_2021_7938_MOESM3_ESM.pdf [file 12864_2021_7938_MOESM3_ESM.pdf]
