# Supplementary material for: Ischemic stroke induces cardiac dysfunction and alters transcriptome profile in mice
Source: PubMed Central journal article supplement (PMC8418010; doi:10.1186/s12864-021-07938-y), 2021-09-04
Supplement: 12864_2021_7938_MOESM4_ESM.pdf [file 12864_2021_7938_MOESM4_ESM.pdf]

Supplemental Table S1. Primers for qPCR

| Target gene | Forward (5' → 3')            | Reverse (5' → 3')          |
|-------------|------------------------------|----------------------------|
| ANP         | CTGCTAGACCACCTGGAGGA         | AAGCTGTTGCAGCCTAGTCC       |
| β-MHC       | TGCAAAGGCTCCAGGTCTGAGGGC     | GCCAACACCAACCTGTCCAAGTTC   |
| Collagen-1  | ACGGCTGCACGAGTCACAC          | GGCAGGCGGGAGGTCTT          |
| Collagen-3  | GTTCTAGAGGATGGCTGTACTAAACACA | TTGCCTTGCGTGTTTGATATTC     |
| atrogin-1   | AGTGAGGACCGGCTACTGTG         | GATCAAACGCTTGCGAATCT       |
| MuRF-1      | AGAGTGAGCTGAGCGATGG          | GTCTGCGGCTGTTGTCT          |
| Arrdc2      | GTGGAAGTCGTGAACCACCG         | GCTGGAAGCTGAAGGGAAACT      |
| Hsd11b1     | GGAGCCCATGTGGTATTGACT        | CCGCAAATGTCATGTCTTCCAT     |
| Hmgcs2      | ACCGTGCTCCCTTCTTAGGT         | GCTCTTCGTGGGTTCTGTGT       |
| Scd4        | GTACTIONTGTGGGGTGAGACTTTTC   | CACCAATGCCCTGTCATAG        |
| Egr1        | AGACGAGTTATCCCAGCCAAA        | GGTCGGAGGATTGGTCATGC       |
| Apln        | CCA CTG ATG TTG CCT CCA GA   | GCG AAA TTT CCT CCT GCC TC |
| Aplnr       | GTCATTCCCTGCCATCTACA         | AAAGTCACCACAAAGGTCAAGT     |
| Gapdh       | CAGTGTTGGGGGCTGAGTTG         | AAAGGGCATCCTGGGCTACA       |
| IL-1β       | GAAGAAGTGCCCATCCTCTG         | AGCTCATATGGGTCCGACAG       |
| TNF-α       | CCGATGGGTTGAACCTTGTC         | GGGCTGGGTAGAGAATGGAT       |
| IL-6        | TCACAGAAGGAGTGGCTAAGGACC     | ACGCACTAGGTTTGCCGAGTAGAT   |
