# Supplementary material for: Ischemic stroke induces cardiac dysfunction and alters transcriptome profile in mice
Source: PubMed Central journal article supplement (PMC8418010; doi:10.1186/s12864-021-07938-y), 2021-09-04
Supplement: 12864_2021_7938_MOESM5_ESM.pdf [file 12864_2021_7938_MOESM5_ESM.pdf]

Supplemental Table S2. Heart rate in the initial state of anesthesia.

| <b>Mice</b> | <b>Systolic</b> | <b>Diastolic</b> |
|-------------|-----------------|------------------|
| Sham01      | 525             | 413              |
| Sham02      | 518             | 499              |
| Sham03      | 415             | 428              |
| Sham04      | 468             | 465              |
| average     | 481.5           | 451.25           |
| MCAO01      | 312             | 288              |
| MCAO02      | 325             | 296              |
| MCAO03      | 444             | 377              |
| MCAO04      | 276             | 276              |
| average     | 339.25          | 309.25           |

A

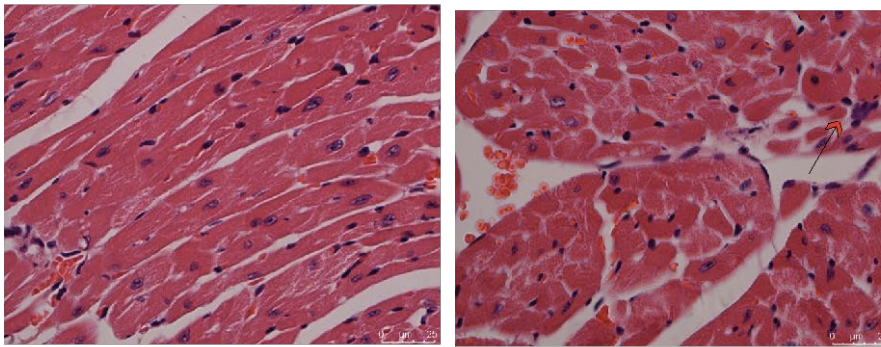

Sham

MCAO

B

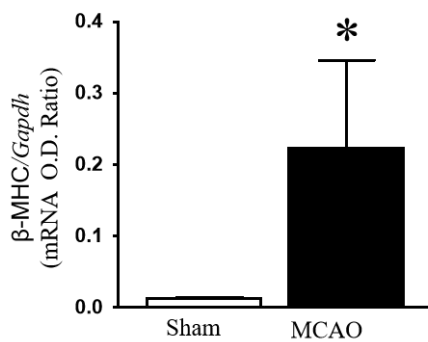

C

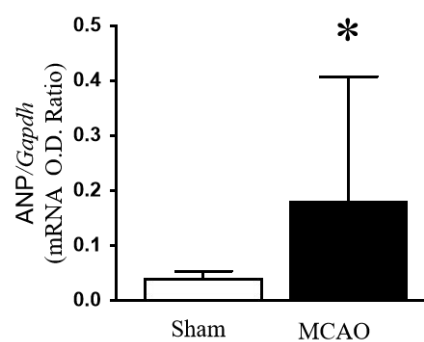

D

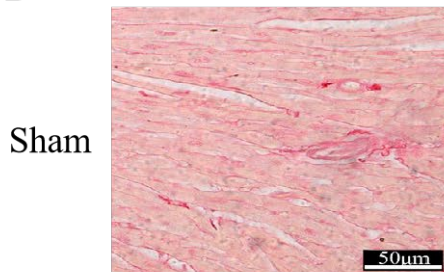

Sham

50um

MCAO

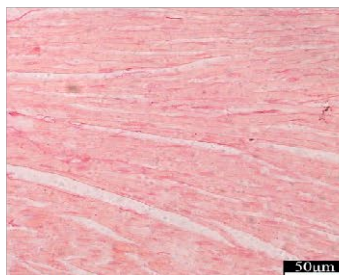

50um

E

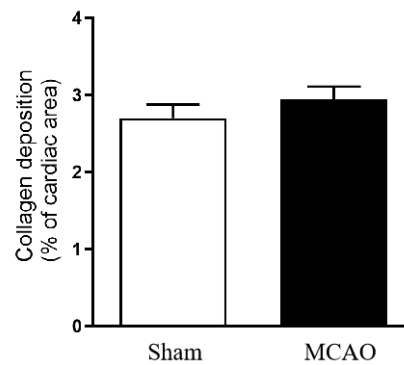

**Supplemental Figure S1. Myocardial remodeling in the heart after stroke.** (A) Hematoxylin and eosin (HE) staining in the heart tissue at 4 days after stroke. (B, C) The mRNA levels of  $\beta$ -MHC and ANP genes normalized to the level of Gapdh. (D,E) Representative and quantitation of picro-sirius red staining for collagen deposition (red). Data are presented as mean  $\pm$  SD, n = 6. \*P < 0.05 vs sham-operated.

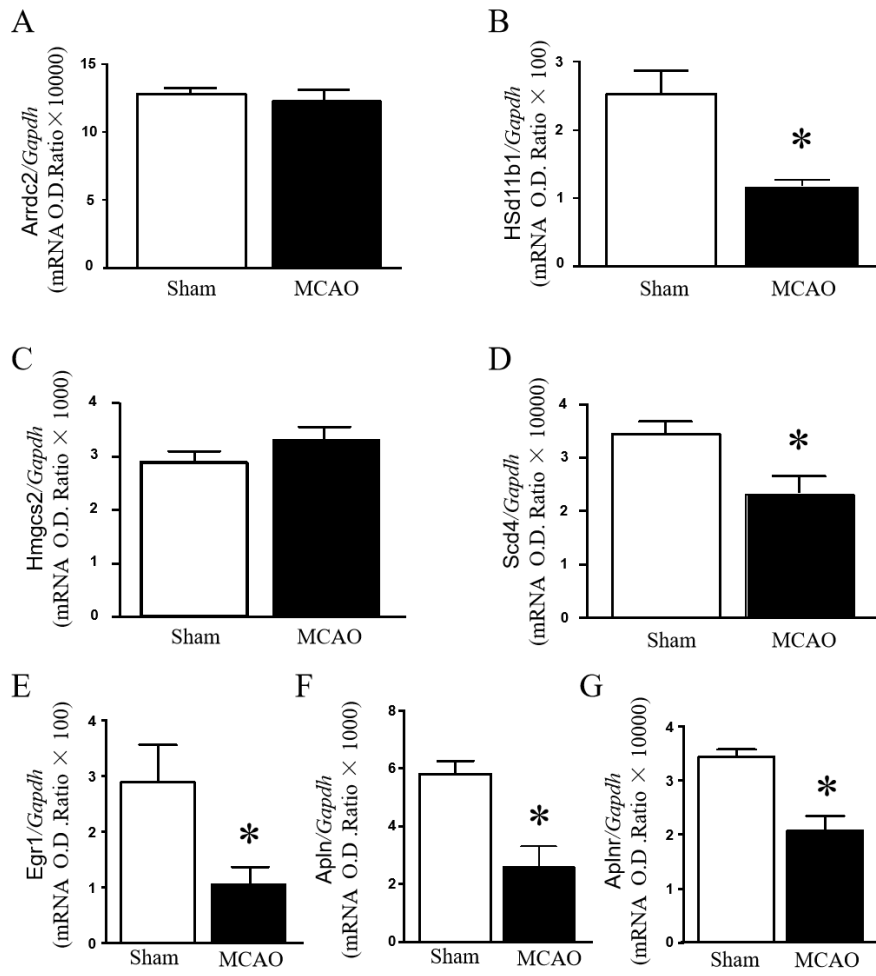

**Supplemental Figure S2.** The mRNA expression levels of genes in heart.
